# Supplementary material
Source: Springer Nature journal article supplement (https://www.springermedizin.de/resource/supplementary/12974_2011_392_MOESM6_ESM.pdf/9601542)

**LNC**

**Day 6**

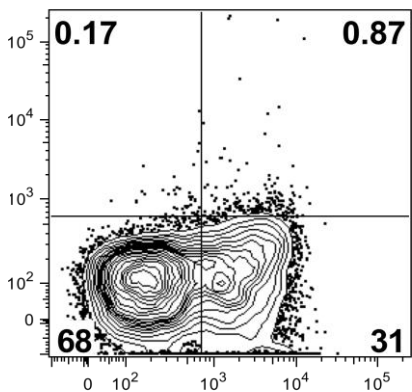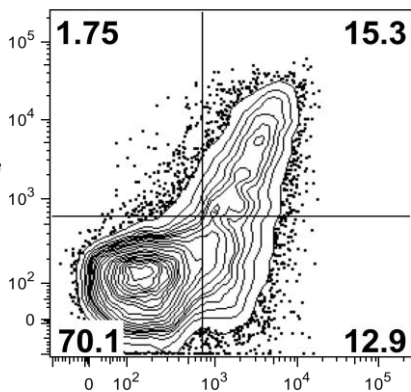

**Day 12**

isotype control

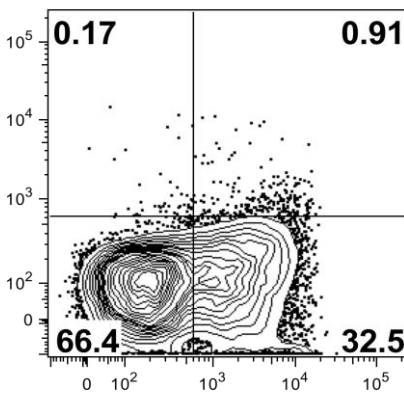

T-bet

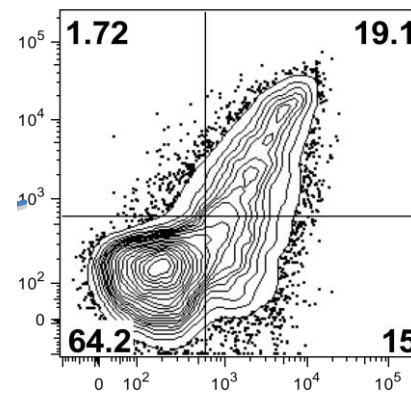

**SPC**

**Day 6**

isotype control

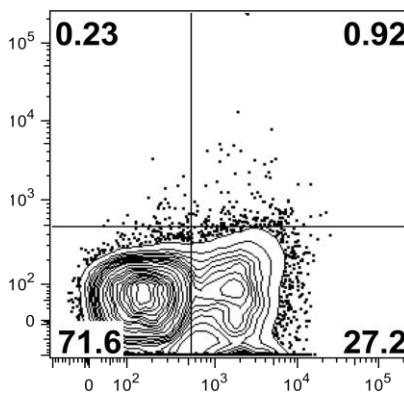

T-bet

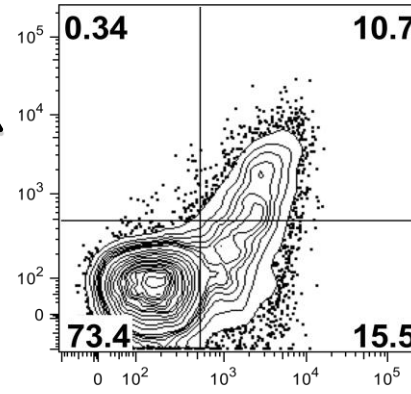

**Day 12**

isotype control

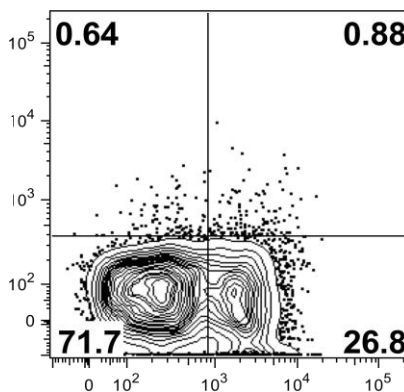

T-bet

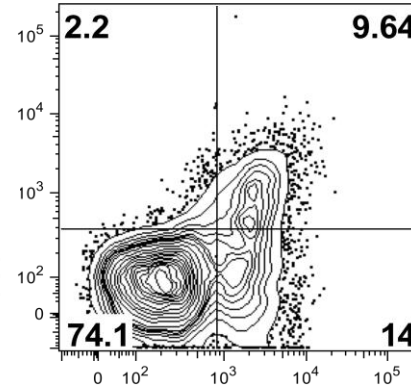

**CD44**

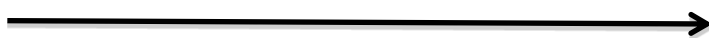

Supplement: MOESM6 [file 9601542]
